# Supplementary material for: High-speed mapping of Hg and Se in biological tissue via laser ablation-inductively coupled plasma-mass spectrometry
Source: Royal Society of Chemistry journal article supplement (doi:10.1039/d2ja00131d), 2022-01-01
Supplement: d2ja00131d1.pdf [file d2ja00131d1.pdf]

## High-speed mapping of Hg and Se in biological tissue via laser ablation – inductively coupled plasma – mass spectrometry

Tom Van Helden,<sup>a</sup> Simone Braeuer,<sup>a,b</sup> Thibaut Van Acker,<sup>a</sup> Olivier Leroux,<sup>c</sup>  
Dominique Van Der Straeten<sup>c</sup> and Frank Vanhaecke <sup>\*a</sup>

<sup>a</sup> Atomic & Mass Spectrometry – A&MS research unit, Department of Chemistry, Ghent University, Campus Sterre, Krijgslaan 281 - S12, 9000 Ghent, Belgium

<sup>b</sup> Institute of Chemistry, Analytical Chemistry, University of Graz, Universitaetsplatz 1, 8010 Graz, Austria

<sup>c</sup> Laboratory of Functional Plant Biology, Department of Biology, Ghent University, K.L. Ledeganckstraat 35, 9000 Ghent, Belgium

### Supplementary information

**Table S1.** Agilent 7900 ICP-MS and LA settings for all experiments aiming at the determination of SPR duration.

|                                      |                                                       |
|--------------------------------------|-------------------------------------------------------|
| Repetition rate (Hz)                 | 1                                                     |
| Energy density (J cm <sup>-2</sup> ) | 1.5                                                   |
| Beam waist diameter (μm)             | 20                                                    |
| Mask shape                           | O                                                     |
| Nuclides monitored                   | <sup>65</sup> Cu, <sup>77</sup> Se, <sup>202</sup> Hg |
| Dwell time (ms)*                     | 1-20, 10-20, 10-20                                    |

**Table S2.** LA-ICP-MS settings and data acquisition conditions for multi-elemental mapping of fungal tissue.

| Teledyne CETAC Technologies Iridia LA system    |                   |                                      |                                      |                                     |                                     |
|-------------------------------------------------|-------------------|--------------------------------------|--------------------------------------|-------------------------------------|-------------------------------------|
|                                                 | Hg-only map       | Fast Ag                              | Slow Ag                              | Fast Se                             | Slow Se                             |
| Repetition rate (Hz)                            | 100               | 500                                  | 100                                  | 500                                 | 100                                 |
| Energy density (J cm <sup>-2</sup> )            | 1.50              | 1.50                                 | 1.50                                 | 1.50                                | 1.50                                |
| He carrier gas flow rate (L min <sup>-1</sup> ) | 0.250             | 0.250                                | 0.250                                | 0.250                               | 0.250                               |
| Beam waist diameter (μm)                        | 10                | 20                                   | 20                                   | 20                                  | 20                                  |
| Mask shape                                      | o                 | o                                    | o                                    | o                                   | o                                   |
| Dosage                                          | 5                 | 5                                    | 5                                    | 5                                   | 5                                   |
| Scan speed (μm s <sup>-1</sup> )                | 200               | 2000                                 | 400                                  | 2000                                | 400                                 |
| Agilent 7900 ICP-MS instrument                  |                   |                                      |                                      |                                     |                                     |
|                                                 | Hg map            | Fast Ag                              | Slow Ag                              | Fast Se                             | Slow Se                             |
| RF power (W)                                    | 1500              | 1500                                 | 1500                                 | 1500                                | 1500                                |
| Sampling depth (mm)                             | 6                 | 6                                    | 6                                    | 6                                   | 6                                   |
| Plasma gas flow rate (L min <sup>-1</sup> )     | 15                | 15                                   | 15                                   | 15                                  | 15                                  |
| Nebulizer gas flow rate (L min <sup>-1</sup> )  | 1.05              | 1.05                                 | 1.05                                 | 1.05                                | 1.05                                |
| Nuclides monitored                              | <sup>202</sup> Hg | <sup>107</sup> Ag, <sup>202</sup> Hg | <sup>107</sup> Ag, <sup>202</sup> Hg | <sup>77</sup> Se, <sup>202</sup> Hg | <sup>77</sup> Se, <sup>202</sup> Hg |
| Integration time (ms)                           | 50                | 10 (2 & 2)                           | 50 (22, 22)                          | 10 (1 & 1)                          | 50 (21 & 21)                        |
| Pixel acquisition rate (Hz)                     | 20                | 100                                  | 20                                   | 100                                 | 20                                  |

**Table S3.** Average SPR durations, defined as FW0.1M, and corresponding standard deviations for the transient signals of  $^{65}\text{Cu}$ ,  $^{77}\text{Se}$  and  $^{202}\text{Hg}$  for every instrumental setup.

|          | $^{65}\text{Cu}^+$ FW0.1M (ms) | $^{77}\text{Se}^+$ FW0.1M (ms) | $^{202}\text{Hg}^+$ FW0.1M (ms) |
|----------|--------------------------------|--------------------------------|---------------------------------|
| <b>A</b> | $105 \pm 2$                    | $185 \pm 6$                    | $204 \pm 10$                    |
| <b>B</b> | $28 \pm 5$                     | $162 \pm 16$                   | $166 \pm 10$                    |
| <b>C</b> | $44 \pm 4$                     | $171 \pm 20$                   | $358 \pm 35$                    |
| <b>D</b> | $39 \pm 5$                     | $152 \pm 17$                   | $305 \pm 21$                    |
| <b>E</b> | $33 \pm 6$                     | $128 \pm 12$                   | $265 \pm 20$                    |
| <b>F</b> | $8 \pm 1$                      | $109 \pm 4$                    | $56 \pm 2$                      |
| <b>G</b> | $7 \pm 1$                      | $61 \pm 4$                     | $50 \pm 2$                      |
